# Supplementary material for: Effects of N,S doping on a graphene oxide aerogel for adsorption and photocatalytic reduction of carbon dioxide
Source: Royal Society of Chemistry journal article supplement (doi:10.1039/d4tc01429d), 2024-01-01
Supplement: d4tc01429d1.pdf [file d4tc01429d1.pdf]

## Supporting Information

# Effect of N, S doping on graphene oxide aerogel for adsorption and photocatalytic reduction of carbon dioxide

*Yuhan Liu, Jing Shang\*, Tong Zhu*

*SKL-ESPC & SEPKL-AERM, College of Environmental Sciences and Engineering,  
and Center for Environment and Health, Peking University, Beijing, 100871, P. R.*

*China*

\* Corresponding Author: shangjing@pku.edu.cn.

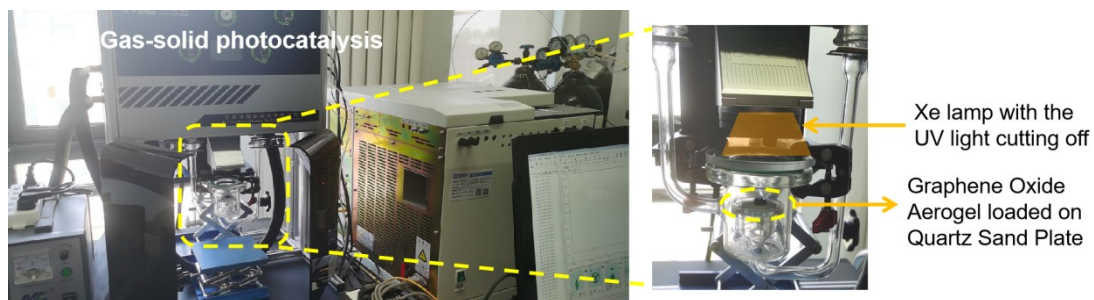

**Fig.S1.** Experimental setup of gas-solid CO<sub>2</sub> photocatalytic reduction.

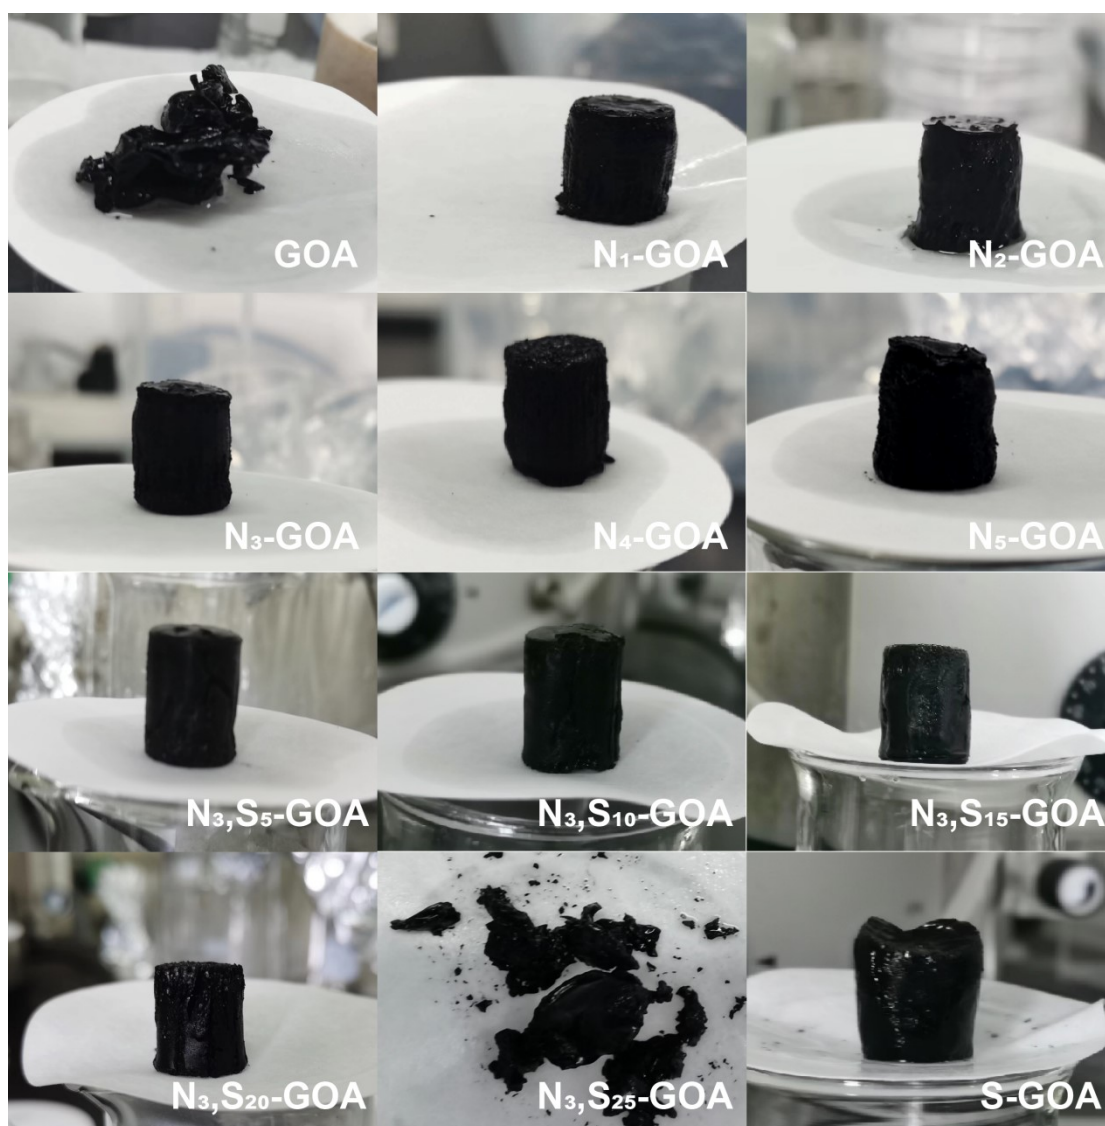

**Fig.S2.** The appearance of GOA obtained by different doping.

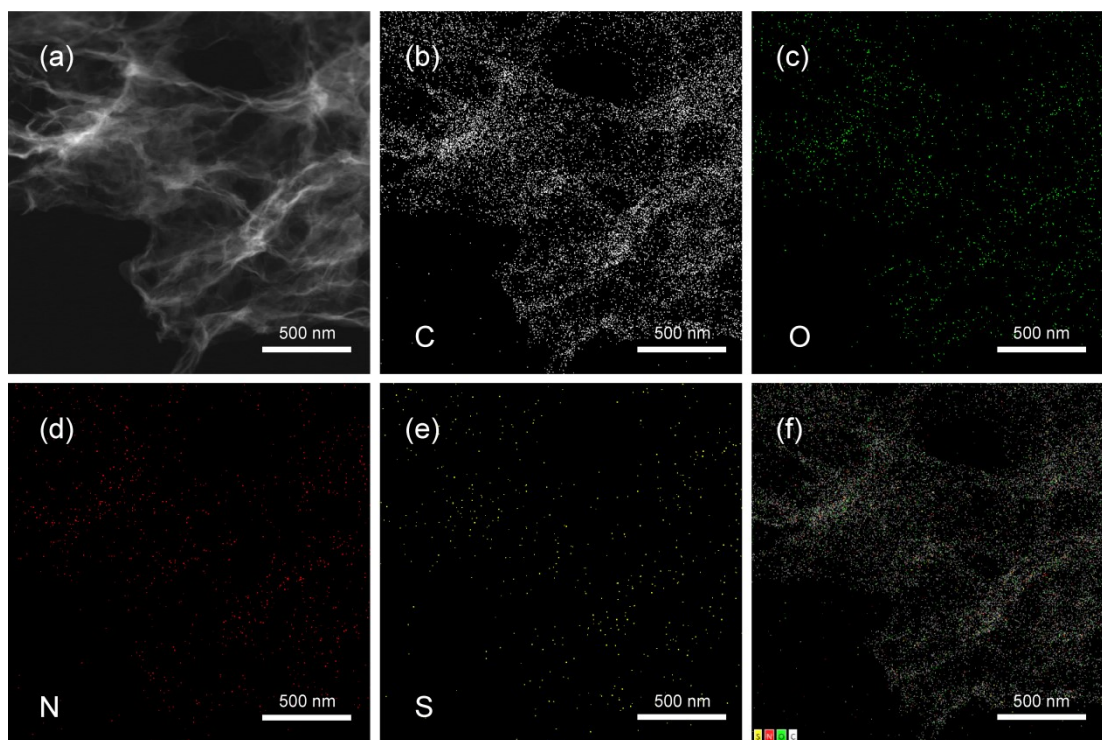

**Fig. S3** The TEM image (a) of N,S-GOA with its corresponding EDS elemental mappings of carbon (b), oxygen (c), nitrogen (d) and sulfur (e).

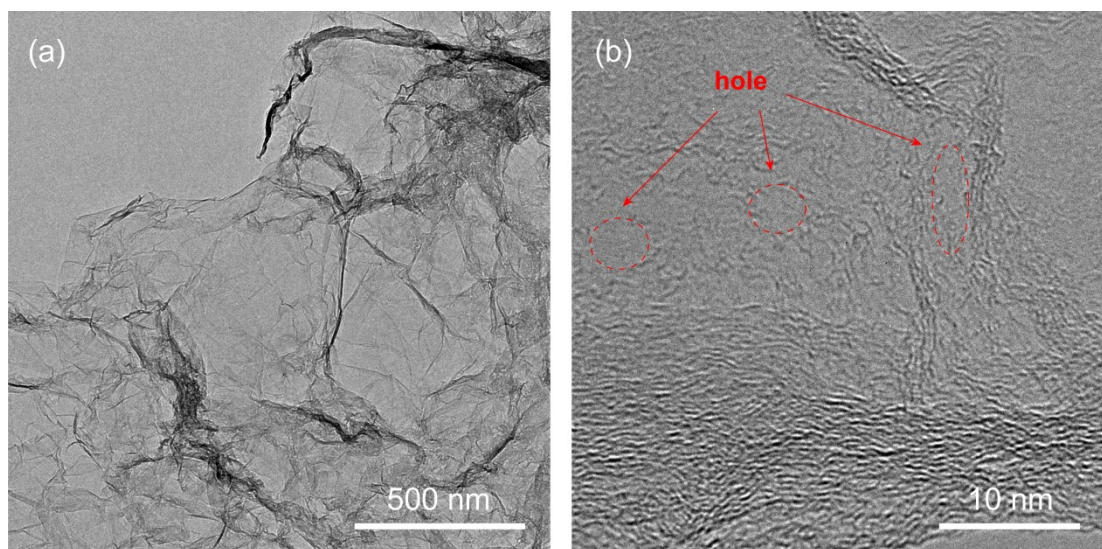

**Fig. S4** Low-magnification (a) and high-resolution (b) TEM images of N,S-GOA.

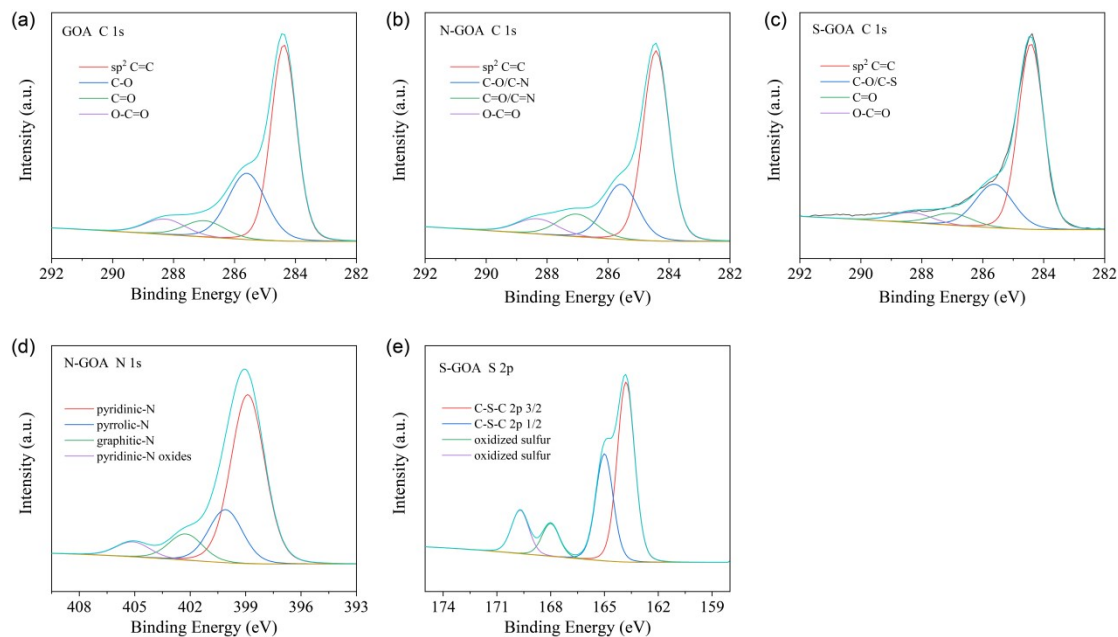

**Fig. S5.** XPS C 1s spectra of (a) GOA, (b) N-GOA, and (c) S-GOA. (d) XPS N 1s spectra of N-GOA. (e) XPS S 2p spectra of S-GOA.

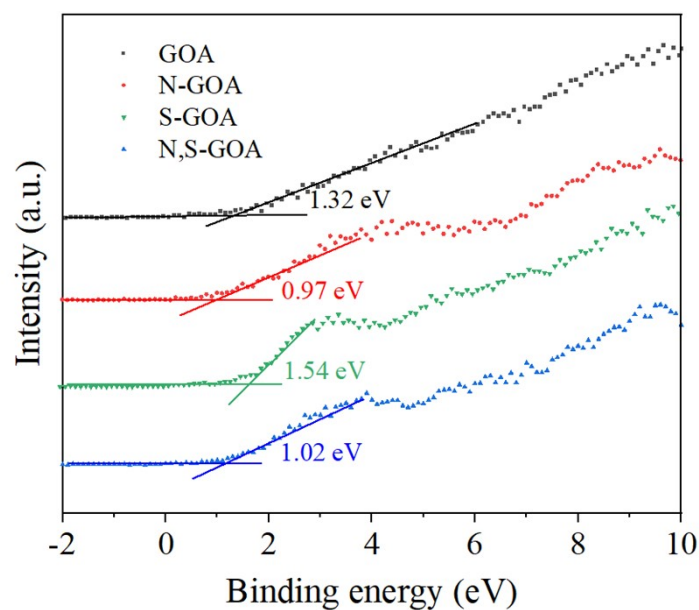

**Fig. S6.** XPS valence band potentials of GOA, N-GOA, S-GOA, and N,S-GOA. After eliminating the measurement error by the formula (1) with the work function ( $\Phi$ ) of XPS analyzer and vacuum level to be 4.39 and 4.44 eV (vs. NHE),<sup>1</sup> the calculated valence band (VB) positions (vs. NHE) of GOA, N-GOA, S-GOA, and N,S-GOA are 1.27, 0.92, 1.49, and 0.97 eV, respectively.

$$VB \text{ (vs. NHE)} = \phi + VB_{XPS} - 4.44 \text{ eV} \quad (1)$$

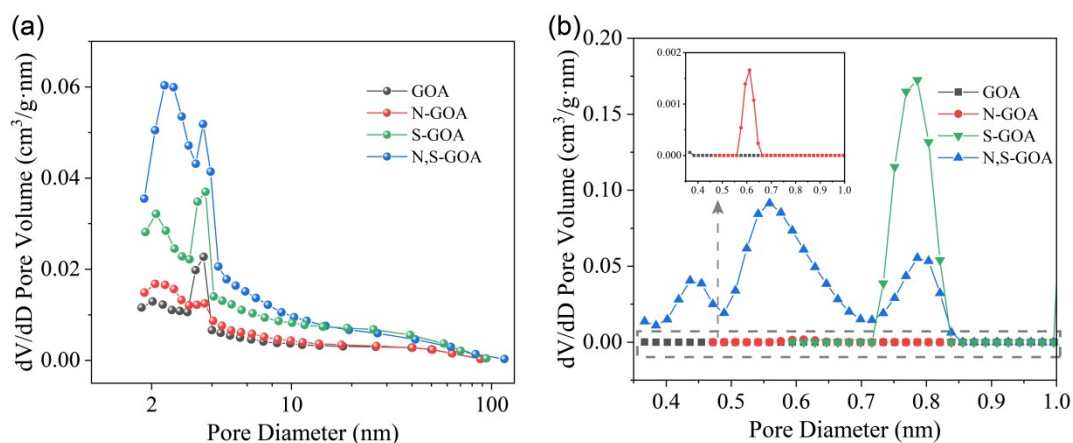

**Fig. S7.** (a) Pore volume distribution of GOA, N-GOA, S-GOA, and N,S-GOA by (a)  $N_2$  adsorption-desorption test and (b)  $CO_2$  adsorption-desorption test (inset is an enlarged view of the GOA and N-GOA curves).

**Table S1.** Contents of major elements of samples based on XPS analyses.

| Sample  | C (at.%) | O (at.%) | O/C ratio (%) | N (at.%) | S (at.%) |
|---------|----------|----------|---------------|----------|----------|
| GOA     | 87.21    | 12.43    | 14.25         | 0.36     | /        |
| N-GOA   | 84.56    | 9.28     | 10.97         | 6.16     | /        |
| S-GOA   | 88.26    | 9.25     | 10.48         | 0.25     | 2.24     |
| N,S-GOA | 85.01    | 7.66     | 9.01          | 5.97     | 1.36     |

**Table S2.** Assigned C 1s, N 1s, and S 2p peaks of samples based on XPS analyses.

|                                                           | GOA   | N-GOA | S-GOA | N,S-GOA |
|-----------------------------------------------------------|-------|-------|-------|---------|
| C=C (284.4 eV)                                            | 56.68 | 59.32 | 63.33 | 62.23   |
| sp <sup>2</sup> carbon bonded with heteroatoms (285.6 eV) | 28.69 | 22.44 | 22.82 | 24.27   |
| C=O/C=N (287.0 eV)                                        | 7.57  | 10.61 | 7.17  | 8.06    |
| O-C=O (288.3 eV)                                          | 7.16  | 7.63  | 6.68  | 5.44    |
| pyridinic-N<br>(398.1-399.3 eV)                           | /     | 64.18 | /     | 48.22   |
| pyrrolic-N<br>(399.8-401.2 eV)                            | /     | 20.15 | /     | 35.04   |
| graphitic-N (401.1-402.7 eV)                              | /     | 9.97  | /     | 12.06   |
| pyridinic-N oxides<br>(402-406 eV)                        | /     | 5.70  | /     | 4.68    |
| Thiophenic(C-S-C) (163.8-<br>165.2 eV)                    | /     | /     | 72.05 | 79.04   |
| Oxidized sulfur (167.4-<br>170.0 eV)                      | /     | /     | 27.95 | 20.96   |

**Table S3.** Surface area and CO<sub>2</sub> uptake capacity for the samples.

| Sample  | S <sub>BET</sub> <sup>a</sup> (m <sup>2</sup> /g) | S <sub>L</sub> <sup>b</sup> (m <sup>2</sup> /g) | PV <sup>c</sup> (cm <sup>3</sup> /g) | Quantity Adsorbed CO <sub>2</sub> <sup>d</sup><br>(cm <sup>3</sup> /g STP) |
|---------|---------------------------------------------------|-------------------------------------------------|--------------------------------------|----------------------------------------------------------------------------|
| GOA     | 79                                                | 189                                             | 0.246                                | 1.04                                                                       |
| N-GOA   | 88                                                | 210                                             | 0.256                                | 2.72                                                                       |
| S-GOA   | 172                                               | 402                                             | 0.507                                | 56.55                                                                      |
| N,S-GOA | 257                                               | 575                                             | 0.568                                | 20.62                                                                      |

<sup>a</sup>Surface area calculated from N<sub>2</sub> adsorption isotherms at 77.5 K using BET equation.

<sup>b</sup>Surface area calculated from N<sub>2</sub> adsorption isotherms at 77.5 K using Langmuir equation. <sup>c</sup>Pore volume calculated from nitrogen isotherm at  $p/p_0=0.986$ , 77.5 K.

<sup>d</sup>Quantity Adsorbed CO<sub>2</sub> determined volumetrically using a Micromeritics TriStar II Plus analyzer at 1.00 bar and 273.15 K.

**Table S4.** Comparison of CO<sub>2</sub> capture capacity on various nanoamaterials.

| Nanoamaterials                            | Exp. Cond.      | Capacity<br>(mmol/g) | Ref.      |
|-------------------------------------------|-----------------|----------------------|-----------|
| S-GOA                                     | 273.15 K, 1 bar | 2.52                 | This work |
| MgO/GO                                    | 60 °C, 1 bar    | 2.79                 | 2         |
| Mo/g-C <sub>3</sub> N <sub>4</sub>        | 273.15 K, 1 bar | 0.07                 | 3         |
| N,O-codoped<br>microporous carbon         | 25 °C, 1 atm    | 3.05                 | 4         |
| Triethylamine/rice<br>husk silica         | 600 °C, 1 atm   | 0.75                 | 5         |
| 70T-MM-550                                | 75 °C, 1 atm    | 3.43                 | 6         |
| HPSA                                      | 25 °C, 1 bar    | 2.07                 | 7         |
| Zn <sub>2</sub> (TRZ) <sub>2</sub> (Fuma) | 298 K, 101 kPa  | 2.78                 | 8         |

## References

- 1 Y. Shang, Y. Wang, C. Lv, F. Jing, T. Liu, W. Li, S. Liu and G. Chen, *Chem. Eng. J.* 2022, **431**, 133898.
- 2 C. A. Gunathilake, G. G. T. A. Ranathunge, R. S. Dassanayake, S. D. Illesinghe, A. S. Manchanda, C. S. Kalpage, R. M. G. Rajapakse and D. G. G. P. Karunaratne, *Environ. Sci.-Nano*, 2020, **7**, 1225-1239.
- 3 S. L. Huang, H. Yi, L. H. Zhang, Z. Y. Jin, Y. J. Long, Y. Y. Zhang, Q. F. Liao, J. Na, H. Z. Cui, S. C. Ruan, Y. Yamauchi, T. Wakihara, Y. V. Kaneti and Y. J. Zeng, *J. Hazard. Mater.*, 2020, **393**, 122324.
- 4 X. Li, G. Y. Ma, X. R. Chen, L. Y. Cheng, C. Fang, H. P. Li, L. Wang, J. Ding, H. Wan and G. F. Guan, *J. Environ. Chem. Eng.*, 2022, **10**, 108526.
- 5 F. Zarei and P. Keshavarz, *Environ. Sci. Pollut. R.*, 2023, **30**, 19278-19291.
- 6 N. Mahinpey and D. Karami, *Catal. Today*, 2022, **404**, 237-243.
- 7 D. Peltzer, J. Múnera and L. Cornaglia, *J. Environ. Chem. Eng.*, 2019, **7**, 102927.
- 8 C. G. Zhou, S. A. Yu, K. Ma, B. Liang, S. Y. Tang, C. J. Liu and H. R. Yue, *Chem. Eng. J.*, 2021, **413**, 127675.
